# Supplementary material for: μ1,1-R-phenylcyanamido bridges as a new safe synthetic strategy for ferromagnetic molecular clusters
Source: Royal Society of Chemistry journal article supplement (doi:10.1039/c5dt04306a), 2016-01-01
Supplement: c5dt04306a1.pdf [file c5dt04306a1.pdf]

## Supporting Information

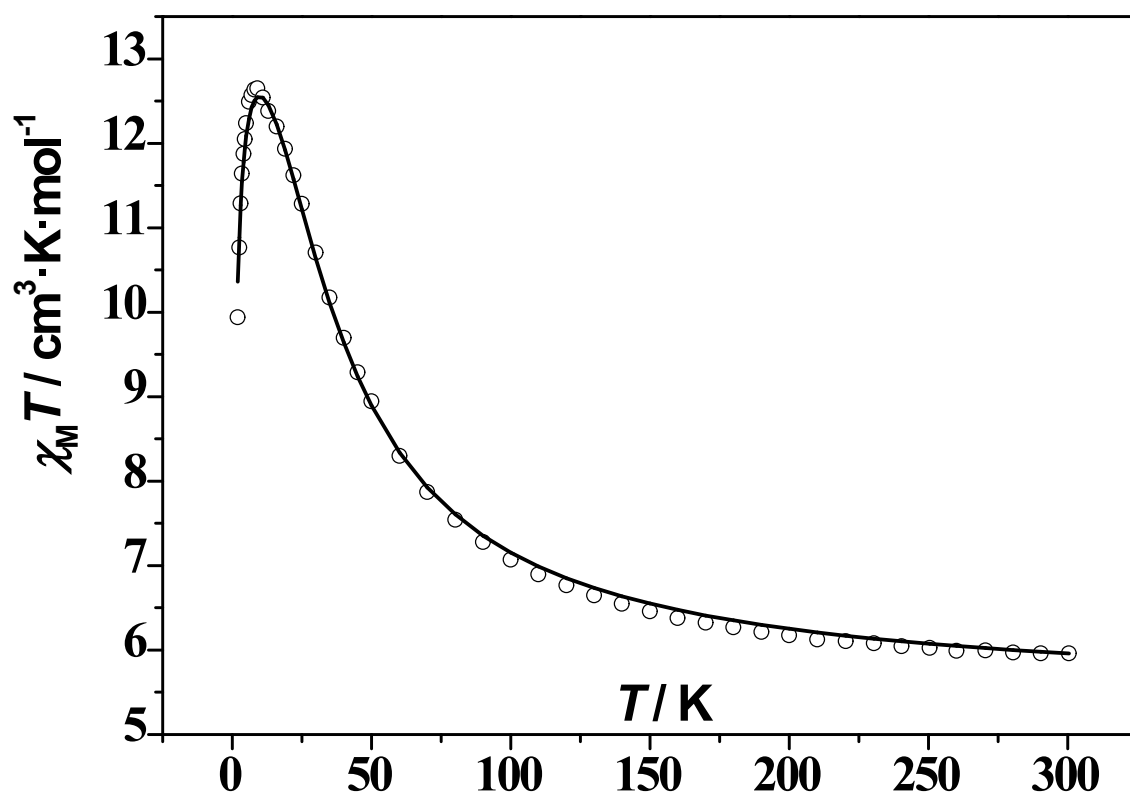

**Figure S1.**  $\chi_M T$  versus  $T$  plot for compound **2**. Solid lines correspond to the best fit obtained.

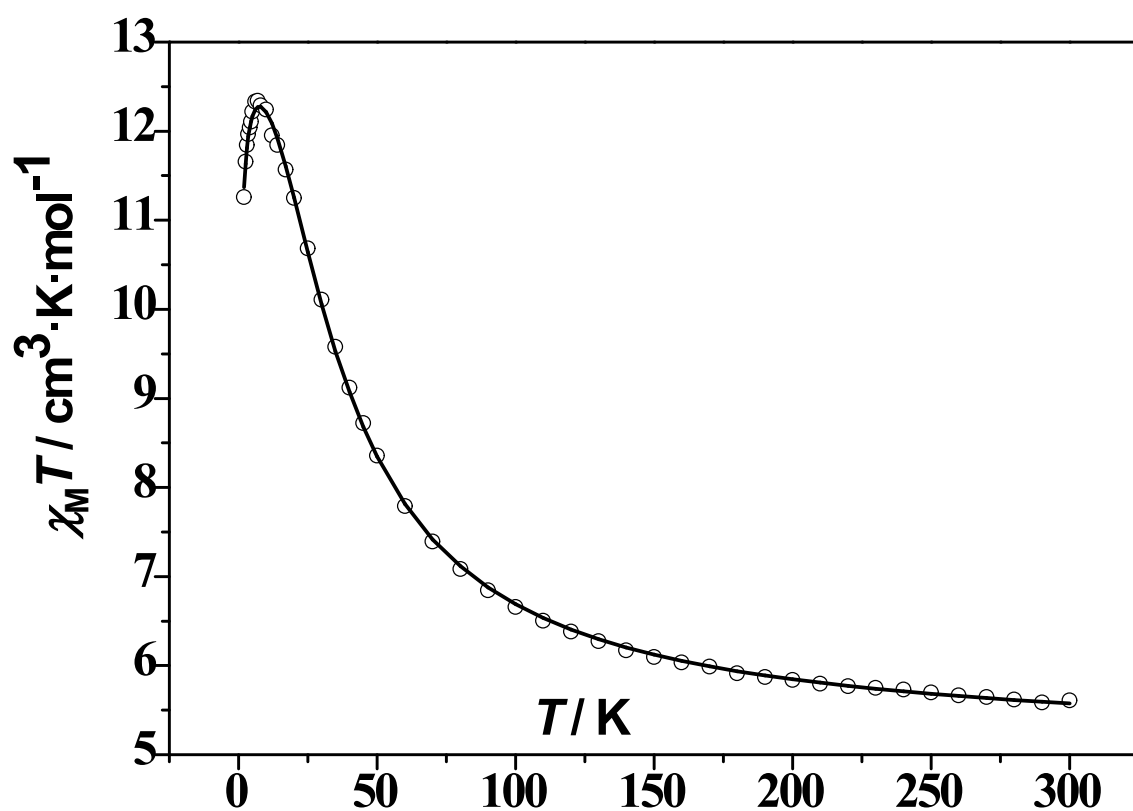

**Figure S2.**  $\chi_M T$  versus  $T$  plot for compound **3**. Solid lines correspond to the best fit obtained.

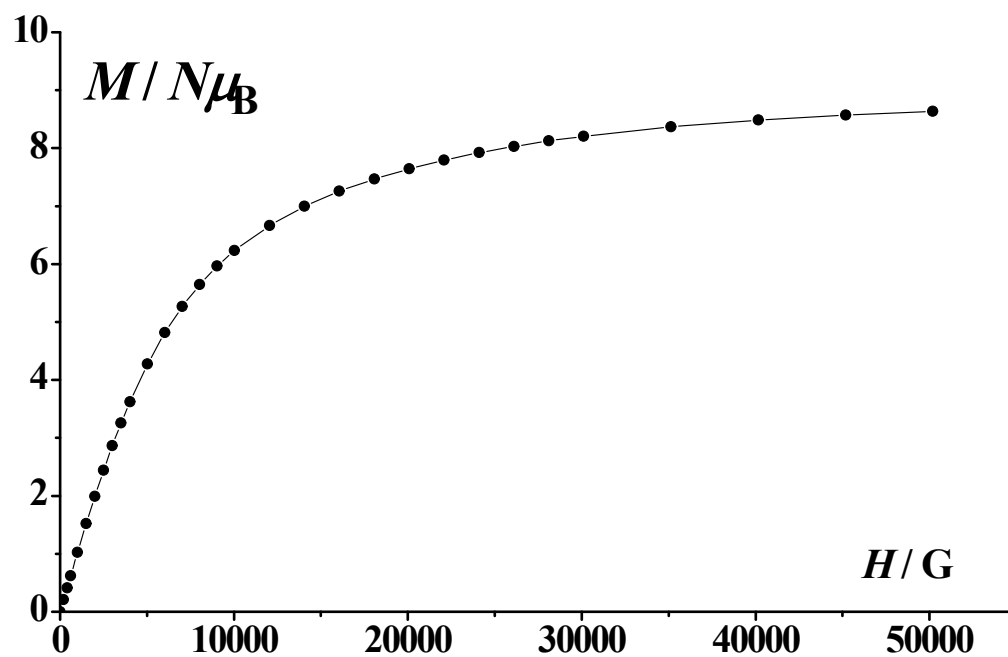

**Figure S3.** Magnetization at 2 K vs. applied field in Gauss for **2**. The solid line in the plot is a guide for the eye.

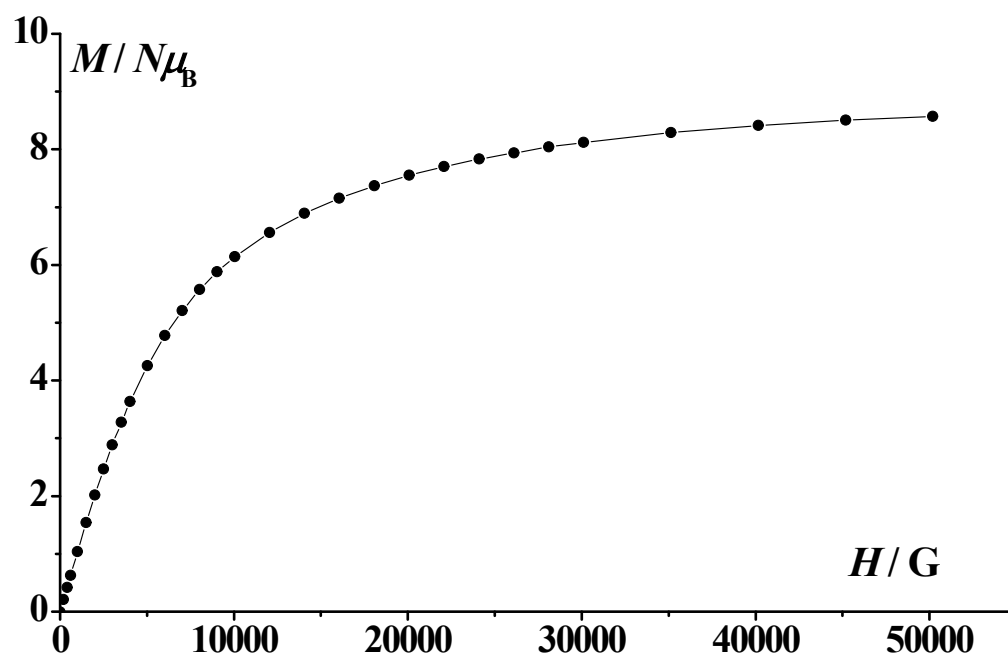

**Figure S4.** Magnetization at 2 K vs. applied field in Gauss for **3**. The solid line in the plot is a guide for the eye.
